# Supplementary material for: Self-assembly of a highly stable and active Co3O4/H-TiO2 bulk heterojunction with high-energy interfacial structures for low temperature CO catalytic oxidation
Source: Royal Society of Chemistry journal article supplement (doi:10.1039/d0cy01477j), 2020-01-01
Supplement: d0cy01477j1.pdf [file d0cy01477j1.pdf]

**Electronic Supplementary Information**

**Self-assembly of highly stable and active  $\text{Co}_3\text{O}_4/\text{H-TiO}_2$   
bulk heterojunction with high-energy interfacial structures  
for low temperature CO catalytic oxidation**

Zehai Xu,<sup>a</sup> Qingchuan Yin,<sup>a</sup> Xiong Li,<sup>a</sup> Qin Meng,<sup>b</sup> Lusheng Xu,<sup>a</sup>

Boshen Lv<sup>a</sup> and Guoliang Zhang<sup>\*a</sup>

## TOF measurements

The formula of turnover frequencies for all samples can be calculated as following:

$$\text{TOF}(\text{s}^{-1}) = \frac{PV}{RT} \times \text{CO vol}\% \times \text{conversion}\% / \frac{m1 \times m2}{M} / t$$

where P is the pressure (Pa), V is the volume of reactant gases through the reactor every minute (mL), R is the gas constant, and T is the room temperature (K), m1 is mass of total catalyst (g), m2 is mass percent of supported metal and M is the molar mass (g/mol).

## Apparent activation energy measurements

The specific reaction rate K can be calculated assuming the ideal gas behaviour as follows:

$$K (\text{mol g}^{-1} \text{ s}^{-1}) = \text{GHSV} (\text{mL h}^{-1} \text{ g}^{-1}) \times 1/3600 (\text{h s}^{-1}) \times 1/1000 (\text{L mL}^{-1}) \times \text{CO vol}\% \times \text{conversion}\% \times 1/22.4 (\text{mol L}^{-1}) \quad (1)$$

The specific reaction rate could be expressed by the Arrhenius equation:

$$K = A \exp(-E_a/RT) \quad (2)$$

where K is the reaction rate of CO (mol CO g<sup>-1</sup> s<sup>-1</sup>), A is the pre-exponential factor (s<sup>-1</sup>), E<sub>a</sub> is the apparent activation energy (kJ mol<sup>-1</sup>), R is the gas constant, and T is the absolute temperature (K).

Taking the natural log of both sides of the equation (2), we get:

$$\ln K = -E_a/T + \ln A \quad (3)$$

By plotting ln K versus 1000/T, the apparent activation energy E<sub>a</sub> can be calculated from the slope as shown in Fig. 5.

**Table S1.** The area percentages of O elemental components calculated  
from the XPS spectra.

| Samples                                            | O 1s                  |                       |                          |                    |
|----------------------------------------------------|-----------------------|-----------------------|--------------------------|--------------------|
|                                                    | O <sub>Ti-O</sub> (%) | O <sub>Co-O</sub> (%) | O <sub>Ti-O-Co</sub> (%) | O <sub>v</sub> (%) |
| C-TiO <sub>2</sub>                                 | 89.12                 | \                     | \                        | 10.88              |
| Co <sub>3</sub> O <sub>4</sub> /C-TiO <sub>2</sub> | 58.57                 | 18.89                 | 11.02                    | 11.52              |
| H-TiO <sub>2</sub>                                 | 88.54                 | \                     | \                        | 11.46              |
| Co <sub>3</sub> O <sub>4</sub> /H-TiO <sub>2</sub> | 55.26                 | 17.63                 | 12.79                    | 14.32              |

**Table S2.** Comparison of TOF and stability with cobalt-based catalysts in literature.

| Catalysts                                                      | Morphology               | TOF(s <sup>-1</sup> )<br>(120°C) | Time on stream<br>(h) | Ref       |
|----------------------------------------------------------------|--------------------------|----------------------------------|-----------------------|-----------|
| Co <sub>3</sub> O <sub>4</sub>                                 | nanoparticles            | 7.79×10 <sup>-4</sup>            | 20                    | S1        |
| Co <sub>3</sub> O <sub>4</sub> / Ni foam                       | nanoarrays               | 3.54×10 <sup>-4</sup>            | 60                    | S2        |
| Co <sub>3</sub> O <sub>4</sub>                                 | nanoparticles            | 9.08×10 <sup>-4</sup>            | 12                    | S3        |
| Co <sub>3</sub> O <sub>4</sub>                                 | nanoparticles            | 2.27×10 <sup>-3</sup>            | 24                    | S4        |
| Co <sub>3</sub> O <sub>4</sub> /CeO <sub>2</sub>               | core-shell nanowires     | 2.47×10 <sup>-3</sup>            | \                     | S5        |
| Co <sub>3</sub> O <sub>4</sub>                                 | nanosheets               | 1.91×10 <sup>-3</sup><br>(100°C) | \                     | S6        |
| Co <sub>3</sub> O <sub>4</sub> /SiO <sub>2</sub>               | nanoparticles            | 1.32×10 <sup>-3</sup>            | \                     | S7        |
| N-Co <sub>3</sub> O <sub>4</sub>                               | nanosheets               | 8.58×10 <sup>-4</sup>            | \                     | S8        |
| Co <sub>3</sub> O <sub>4</sub> /CeO <sub>2</sub>               | nanoparticles            | 2.70×10 <sup>-3</sup>            | \                     | S9        |
| Co <sub>3</sub> O <sub>4</sub> /CeO <sub>2-x</sub>             | nanoparticles            | 3.15×10 <sup>-4</sup>            | 100                   | S10       |
| Co <sub>3</sub> O <sub>4</sub> /CeO <sub>2</sub>               | nanorods                 | 6.60×10 <sup>-4</sup>            | \                     | S11       |
| Co <sub>3</sub> O <sub>4</sub> /SiO <sub>2</sub>               | multi-yolk-double-shell  | 3.24×10 <sup>-3</sup><br>(100°C) | 28                    | S12       |
| Co <sub>3</sub> O <sub>4</sub> /Al <sub>2</sub> O <sub>3</sub> | nanorods                 | 7.37×10 <sup>-4</sup>            | \                     | S13       |
| Co <sub>3</sub> O <sub>4</sub>                                 | nanosheets               | 1.97×10 <sup>-3</sup><br>(110°C) | 6                     | S14       |
| Co <sub>3</sub> O <sub>4</sub> /H-TiO <sub>2</sub>             | cross-section octahedron | 3.56×10 <sup>-3</sup>            | 93                    | This work |
| Co <sub>3</sub> O <sub>4</sub> /C-TiO <sub>2</sub>             | cross-section octahedron | 1.79×10 <sup>-3</sup>            | 42                    |           |
| Co <sub>3</sub> O <sub>4</sub> /P25                            | nanoparticles            | 1.28×10 <sup>-3</sup>            | 21                    |           |

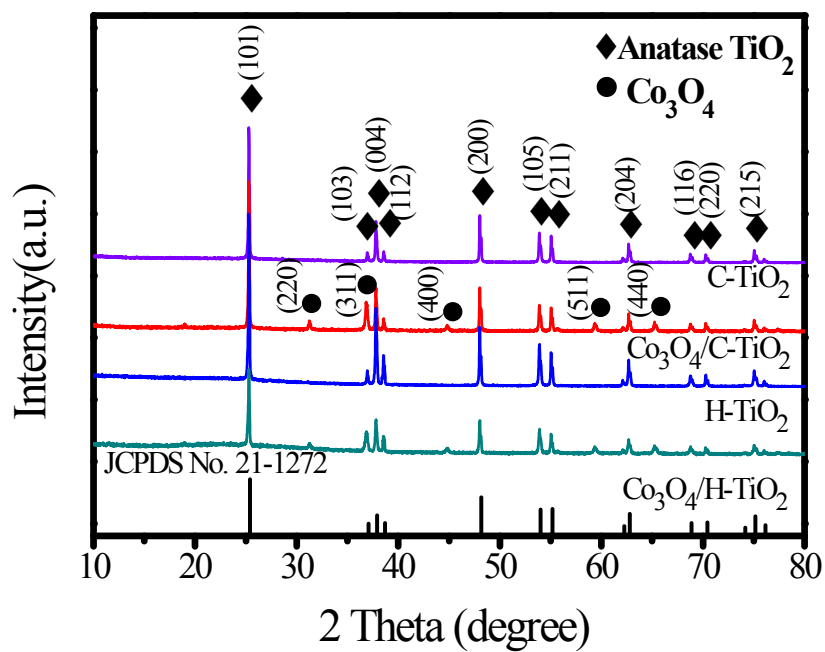

**Fig. S1.** XRD patterns of C-TiO<sub>2</sub>, H-TiO<sub>2</sub>, Co<sub>3</sub>O<sub>4</sub>/C-TiO<sub>2</sub> and Co<sub>3</sub>O<sub>4</sub>/H-TiO<sub>2</sub>. The results demonstrate that preferential growth orientation of H-TiO<sub>2</sub> is [112] direction. After loading Co<sub>3</sub>O<sub>4</sub> nanoparticles, some small peaks appeared in the patterns.

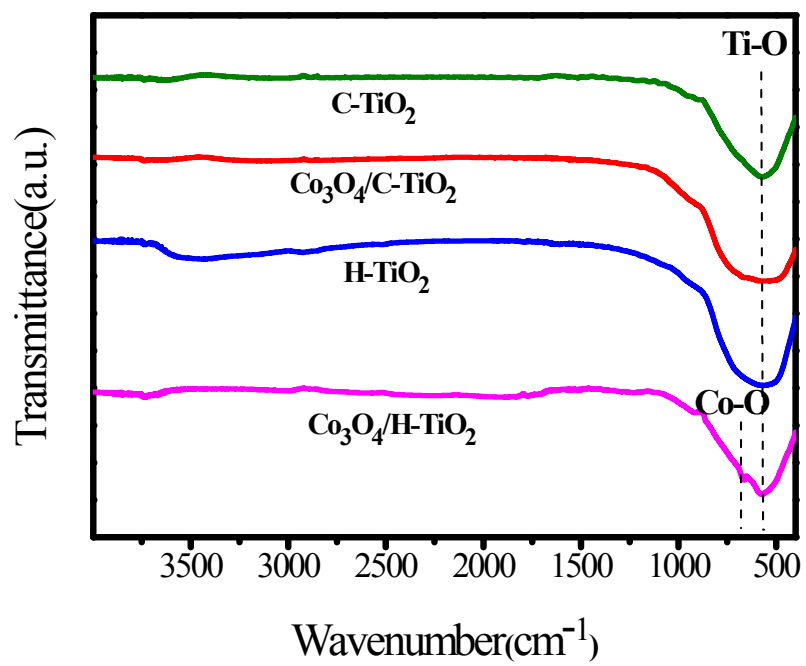

**Fig. S2.** FTIR spectra of C-TiO<sub>2</sub>, H-TiO<sub>2</sub>, Co<sub>3</sub>O<sub>4</sub>/C-TiO<sub>2</sub> and Co<sub>3</sub>O<sub>4</sub>/H-TiO<sub>2</sub>.

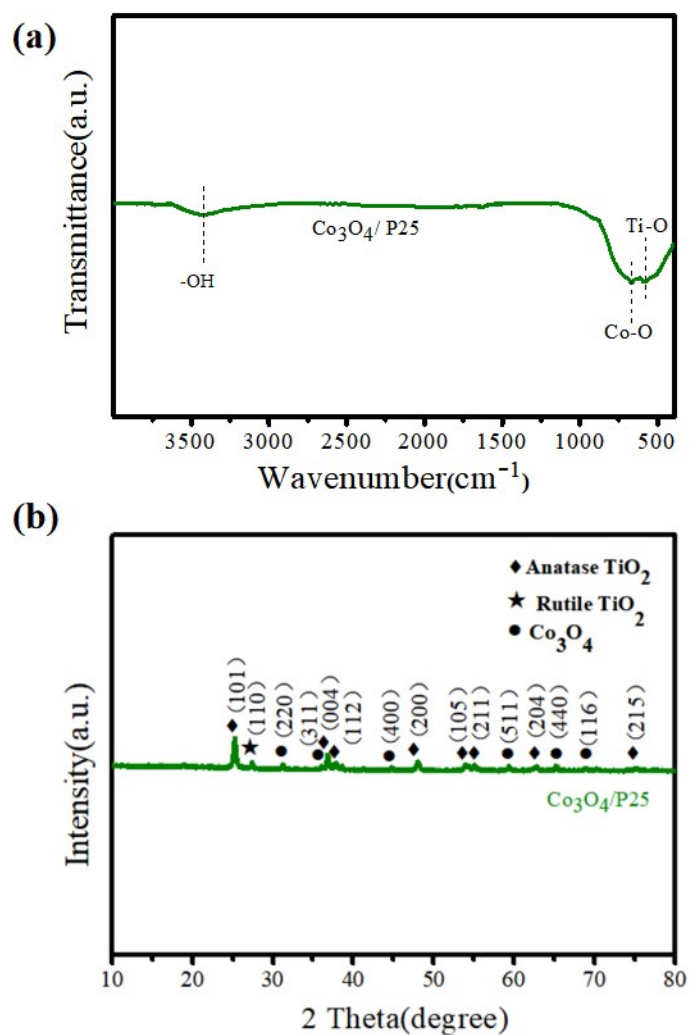

**Fig. S3.** FTIR spectrum of Co<sub>3</sub>O<sub>4</sub>/P25 (a) and XRD pattern of Co<sub>3</sub>O<sub>4</sub>/P25 (b). The generated Co-O bond in FTIR spectrum and new small peaks in XRD pattern demonstrate that Co<sub>3</sub>O<sub>4</sub> nanoparticles were successfully loaded on P25 supports.

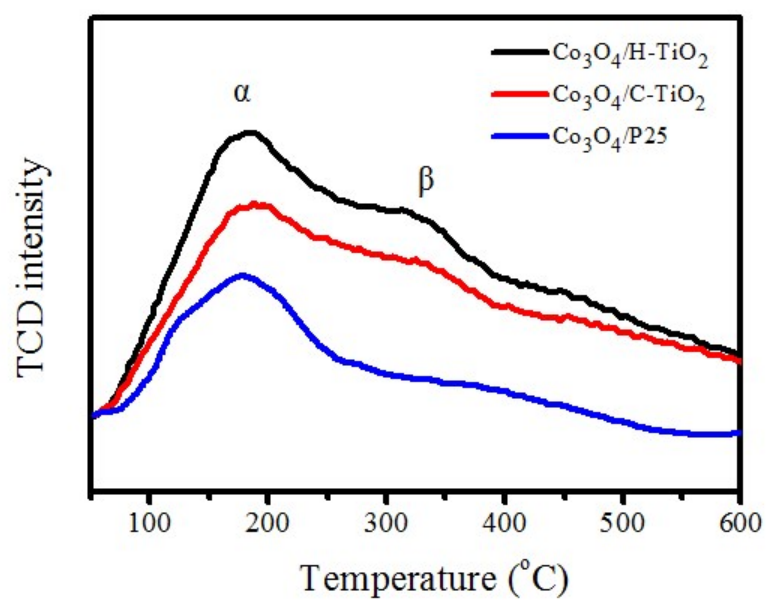

**Fig. S4.** CO-TPD profiles of different catalysts.



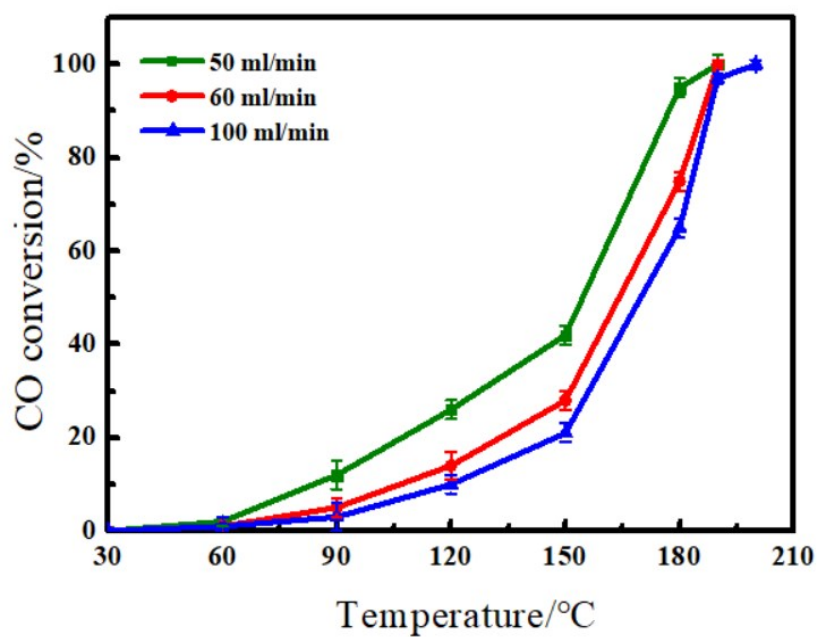

**Fig. S5.** Conversion rate of catalytic oxidation of CO by  $\text{Co}_3\text{O}_4/\text{H-TiO}_2$  at different flow rates of mixed gas ( $\text{N}_2$ : 98%,  $\text{O}_2$ : 1%,  $\text{CO}$ : 1%).

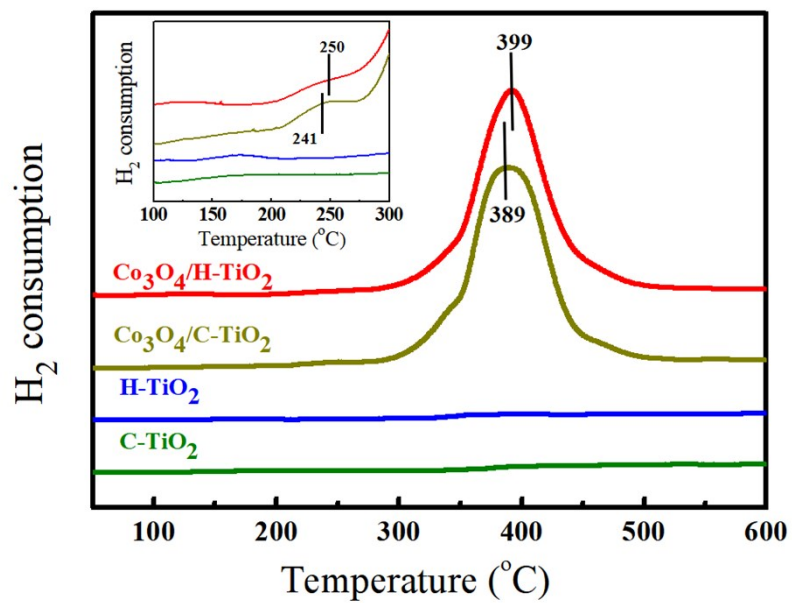

**Fig. S6.** H<sub>2</sub>-TPR diagram of synthesized catalysts.

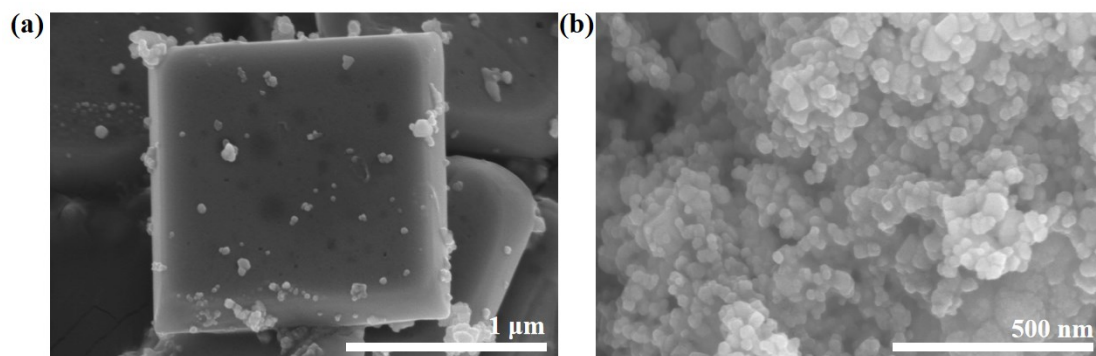

**Fig. S7.** SEM images of Co<sub>3</sub>O<sub>4</sub>/C-TiO<sub>2</sub> (a) and Co<sub>3</sub>O<sub>4</sub>/P25 (b) samples after multiple uses in catalysis.

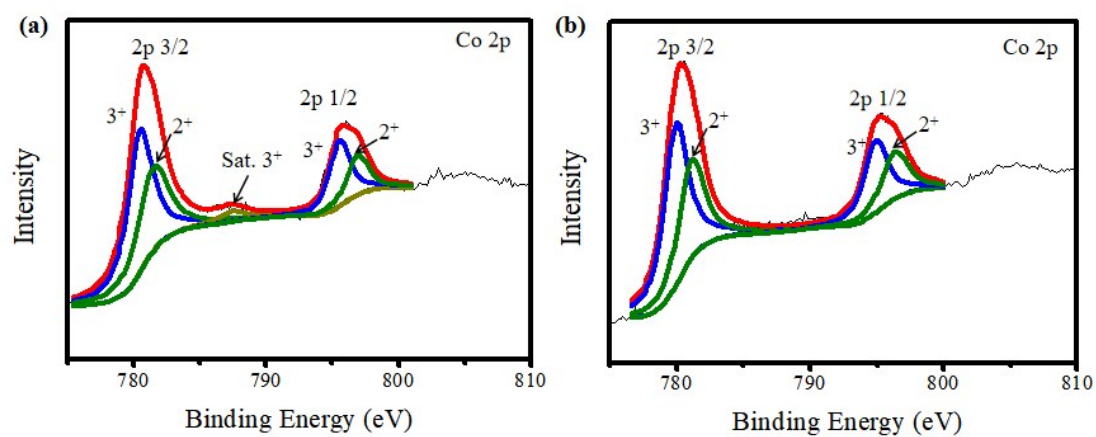

**Fig. S8.** Co 2p spectra of  $\text{Co}_3\text{O}_4/\text{H-TiO}_2$  (a) and  $\text{Co}_3\text{O}_4/\text{C-TiO}_2$  (b) after CO oxidation reaction.

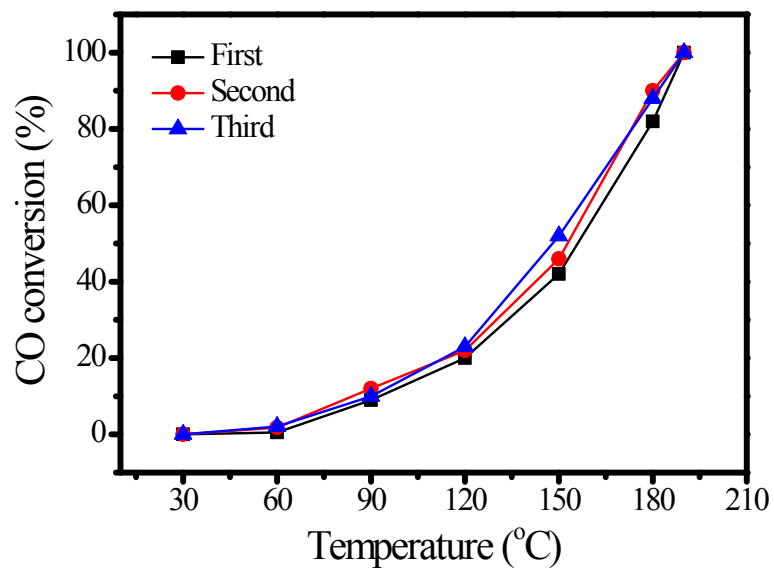

**Fig. S9.** Reusability of catalysts after subsequent reactions. The catalysts can be recovered to their initial state simply through regenerations up to three cycles.

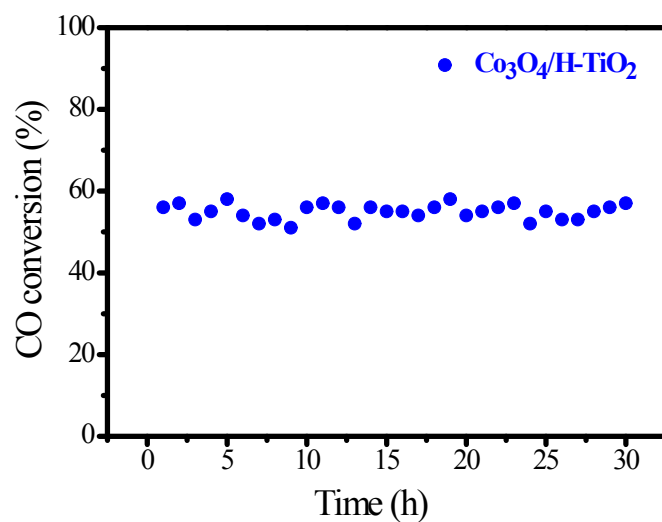

**Fig. S10.** Long-term stability test of prepared Co<sub>3</sub>O<sub>4</sub>/H-TiO<sub>2</sub> catalyst under moisture-rich conditions (~2% H<sub>2</sub>O) at 180 °C. The Co<sub>3</sub>O<sub>4</sub>/H-TiO<sub>2</sub> bulk heterojunction can keep attractive activity in the presence of steam for 30 h, revealing high water resistance properties.

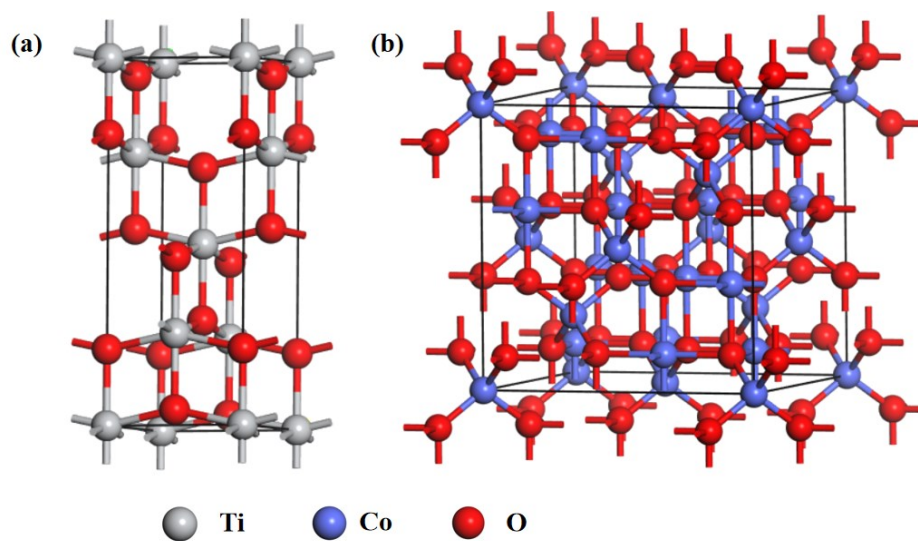

**Fig. S11.** Physical models of anatase  $\text{TiO}_2$  (a) and cubic  $\text{Co}_3\text{O}_4$  (b). The models of anatase  $\text{TiO}_2$  and cubic  $\text{Co}_3\text{O}_4$  were constructed with parameters derived from JCPDS 21-1272 and JCPDS 42-1467, respectively.

## References:

- S1. S. J. Deng, X. C. Xiao, X. X. Xing, J. M. Wu, W. Wen, Y. D. Wang, *J. Mol. Catal. A: Chem.*, 2015, **398**, 79-85.
- S2. S. P. Mo, S. D. Li, Q. M. Ren, M. Y. Zhang, Y. H. Sun, B. F. Wang, Z. T. Feng, Q. Zhang, Y. F. Chen, D. Q. Ye, *Nanoscale*, 2018, **10**, 7746-7758.
- S3. M. H. Li, F. F. Bi, Y. D. Xu, P. P. Hao, K. Xiang, Y. Zhang, S. Y. Chen, J. Guo, X. F. Guo, W. P. Ding, *ACS Catal.* 2019, **9**, 11676-11684.
- S4. Z. J. Chen, Y. J. Wang, Q. N. Liang, L. Y. Chen, W. T. Zhan, Y. W. Li, *Sci. China Mater.* 2020, **63**, 267-275.
- S5. J. M. Zhen, X. Wang, D. P. Liu, Z. Wang, J. Q. Li, F. Wang, Y. H. Wang, H. J. Zhang, *Nano Res.*, 2015, **8**, 1944-1955.
- S6. X. Y. Wang, X. Y. Li, J. C. Mu, S. Y. Fan, X. Chen, L. Wang, Z. F. Yin, M. Tade, S. M. Liu, *ACS Appl. Mater. Inter.*, 2019, **11**, 41988-41999.
- S7. N. Yan, Q. W. Chen, F. Wang, Y. Wang, H. Zhong, L. Hua, *J. Mater. Chem. A.*, 1, **2013**, 637-643.
- S8. C. C. Yin, Y. A. Liu, Q. N. Xia, S. F. Kang, X. Lib, Y. G. Wang, L. F. Cui, *J. Colloid Interf. Sci.*, 2019, **553**, 427-435.
- S9. L. Lukashuk, K. Föttinger, E. Kolar, C. Rameshan, D. Teschner, M. Havecker, A. Knop-Gericke, N. Yigit, H. Li, E. McDermott, M. Stoger-Pollach, G. Rupprechter, *J. Catal.*, 2016, **344**, 1-15.
- S10. H. Wang, D. Mao, J. Qi, Q. H. Zhang, X. H. Ma, S. Y. Song, *Adv. Funct. Mater.*, 2019, **29**, 1806588.



- S11. J. Q. He, D. Y. Chen, N. J. Li, Q. F. Xu, H. Li, J. H. He, J. M. Lu, *Chemsuschem.*, 2019, **12**,1084-1090.
- S12. Y. J. Wang, Z. J. Chen, R. Q. Fang, Y. W. Li, *Chemcatchem.*, 2019, **11**, 772-779.
- S13. J. Yang, J. Guo, Y. B. Wang, T. Wang, J. Gu, L. M. Peng, N. H. Xue, Y. Zhu, X. F. Guo, W. P. Ding, *Appl. Surf. Sci.*, 2018, **453**, 330-335.
- S14. C. X. Xu, Y. Q. Liu, C. Zhou, L. Wang, H. R. Geng, Y. Ding, *Chemcatchem.*, 2011, **3**, 399-407.
